# Supplementary material for: The influence of excessive stress on the quality of life of medical students in the Czech Republic – National sample
Source: Research Square preprint supplement (doi:10.21203/rs.3.rs-2283482/v1), 2023-01-02
Supplement: Supplementary file 1 [file 6d8f05489febdc17dd9a1ca6.xlsx]

## Sheet: Hárok 1 - Tabulka 1 - Možnosti 
Table 1 - Options for solving the causes of the main stress groups by medical faculties and students
	Faculties´ options	Students´ options
Stress from exams (volume of study, implementation of exams)	- Fairness, reliability and predictability of examining - Clear framing of the required range of knoledge	- Evaluation of teaching quality - Honest and systematic preparation for exams - Using the priniples of effective time management - Using effective study methods
Stress from the medical environment and pressure	- Education and enlightment of students - Providing contacts for professional advice - Active search for factors of unnecessary stress	- Using the principles of psychohygiene - At the right time seeking help in cases where the stress exceeds the bearable limit
